# Supplementary material for: Tocilizumab does not block interleukin-6 (IL-6) signaling in murine cells
Source: PubMed Central journal article supplement (PMC7197771; doi:10.1371/journal.pone.0232612), 2020-05-04
Supplement: pone.0232612.s001.pdf [file pone.0232612.s001.pdf]

Figure 2 D/E

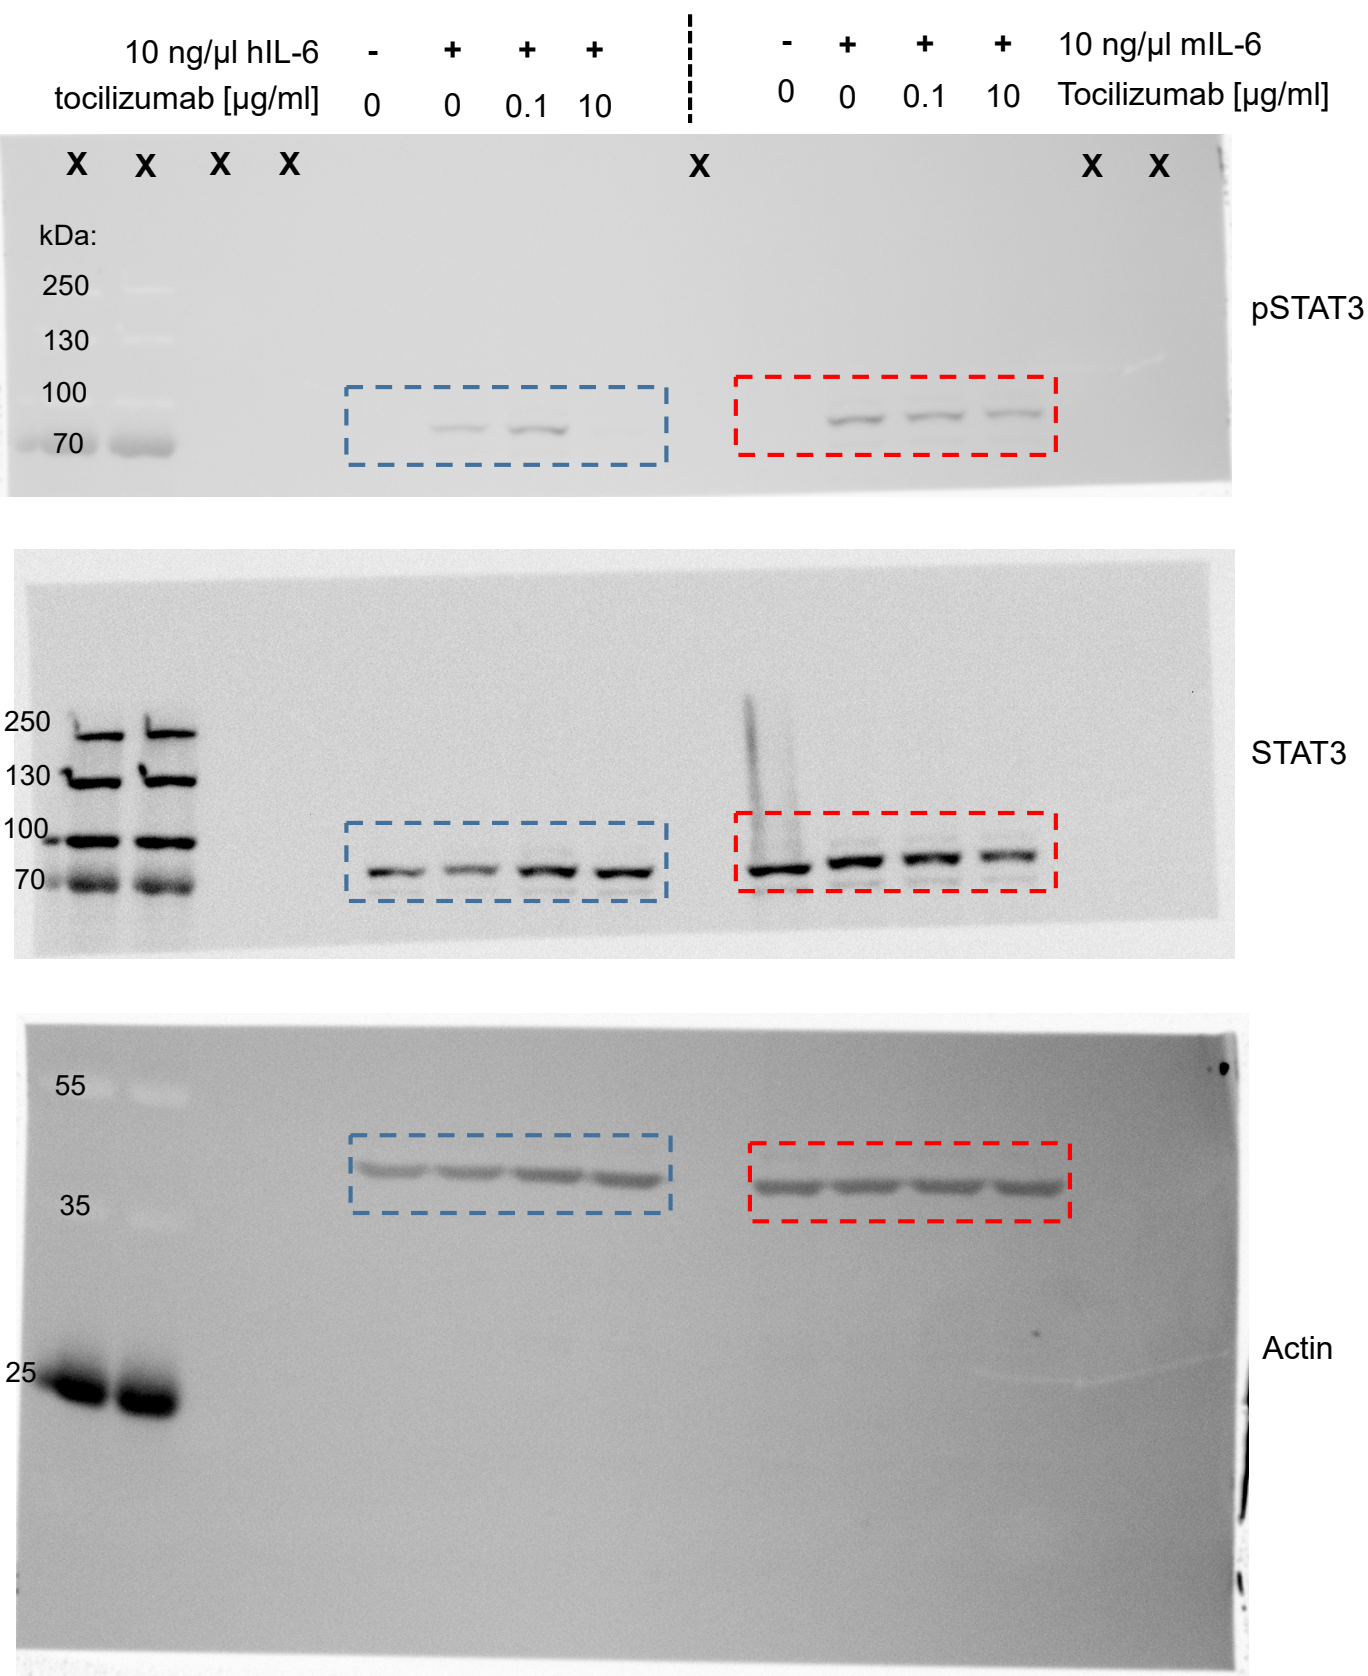

Detected with Alexa Fluor488- and Alexa Fluor647-conjugated antibodies using a ChemoStar ECL Imager (Intas)

Lanes not included in the figures are marked with an X

Figure 3C

|                      |   |   |     |    |
|----------------------|---|---|-----|----|
| 10 ng/ $\mu$ l hIL-6 | - | + | +   | +  |
| MR16-1 [ $\mu$ g/ml] | 0 | 0 | 0.1 | 10 |

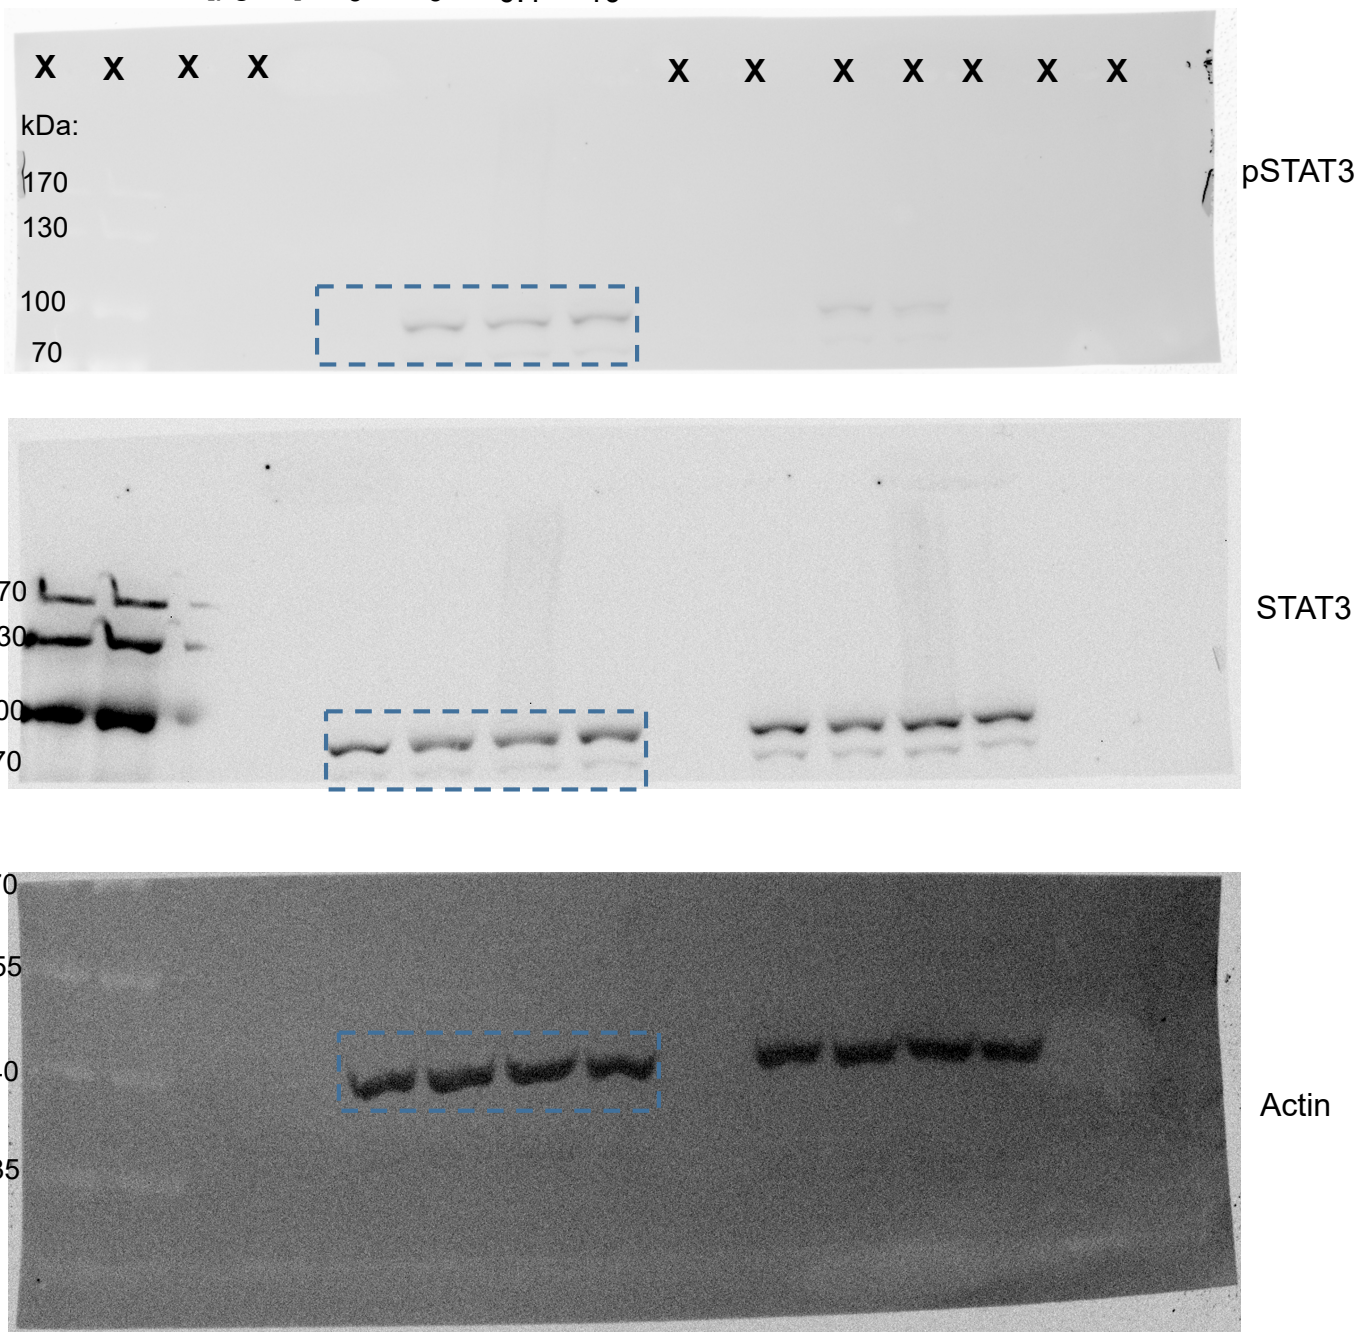

Detected with Alexa Fluor488- and Alexa Fluor647-conjugated antibodies using a ChemoStar ECL Imager (Intas)

Lanes not included in the figures are marked with an X

Figure 3D

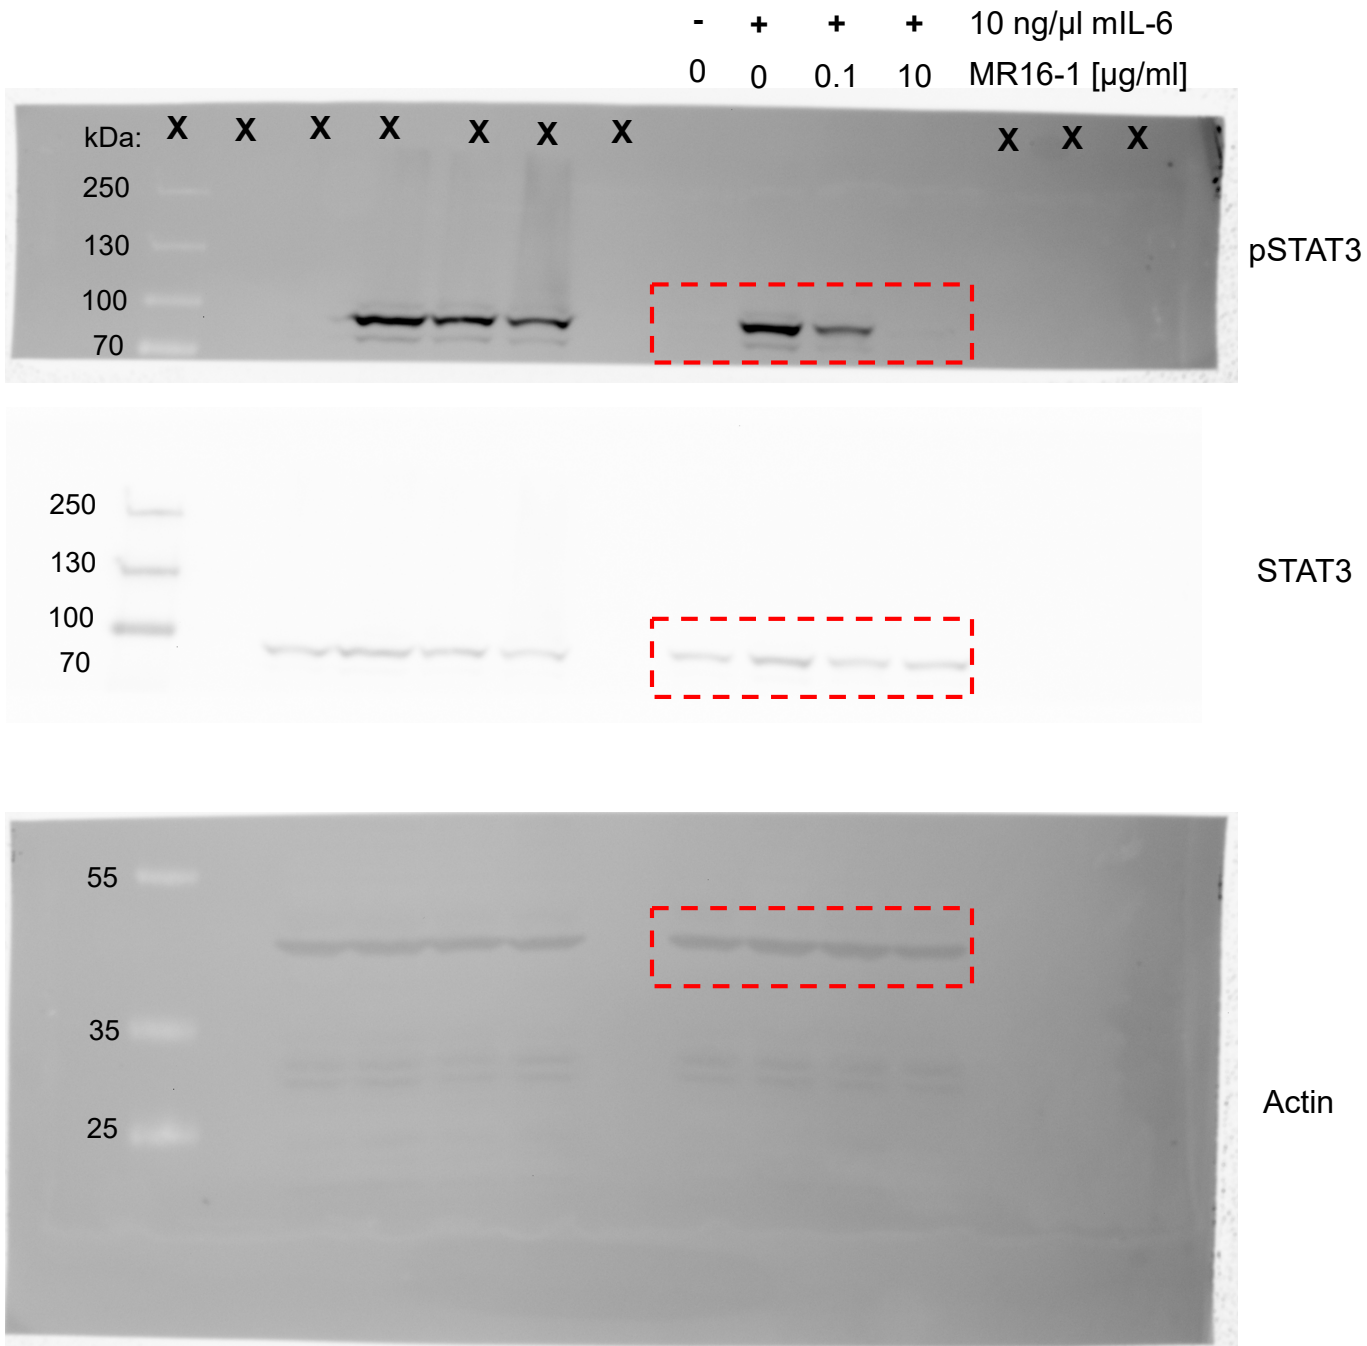

Detected with Alexa Fluor488- and Alexa Fluor647-conjugated antibodies using a ChemoStar ECL Imager (Intas)

Lanes not included in the figures are marked with an X

Figure 4A

|                           |   |   |     |    |
|---------------------------|---|---|-----|----|
| 10 ng/ $\mu$ l hIL-6      | - | + | +   | +  |
| tocilizumab [ $\mu$ g/ml] | 0 | 0 | 0.1 | 10 |

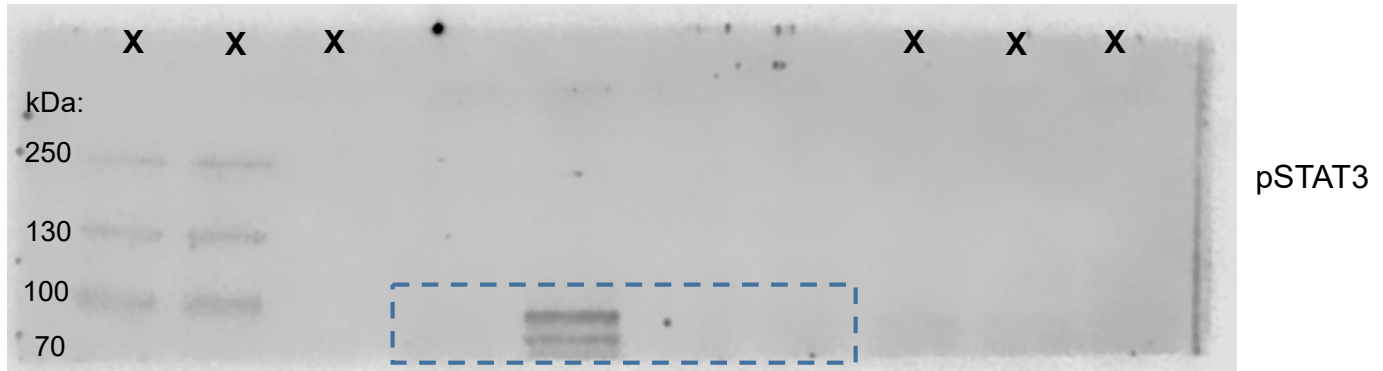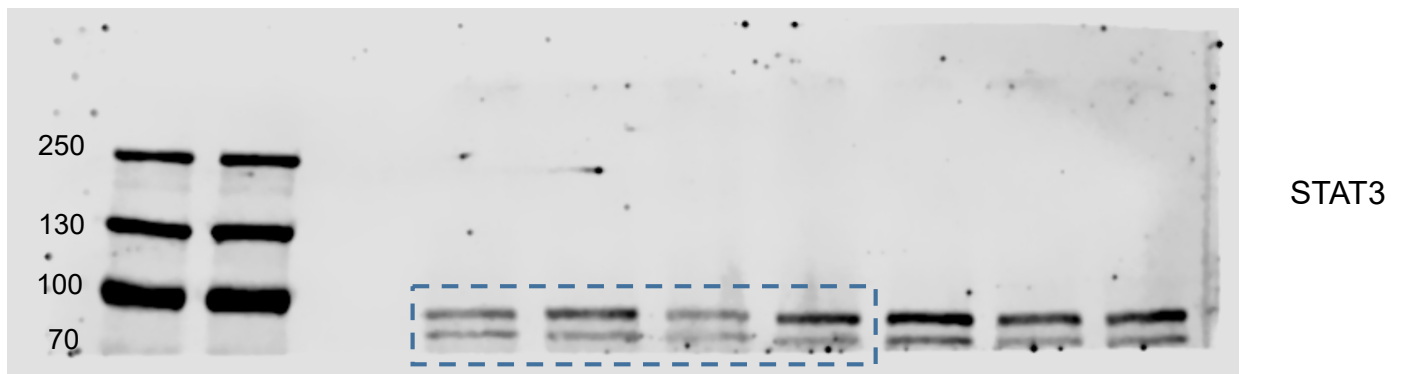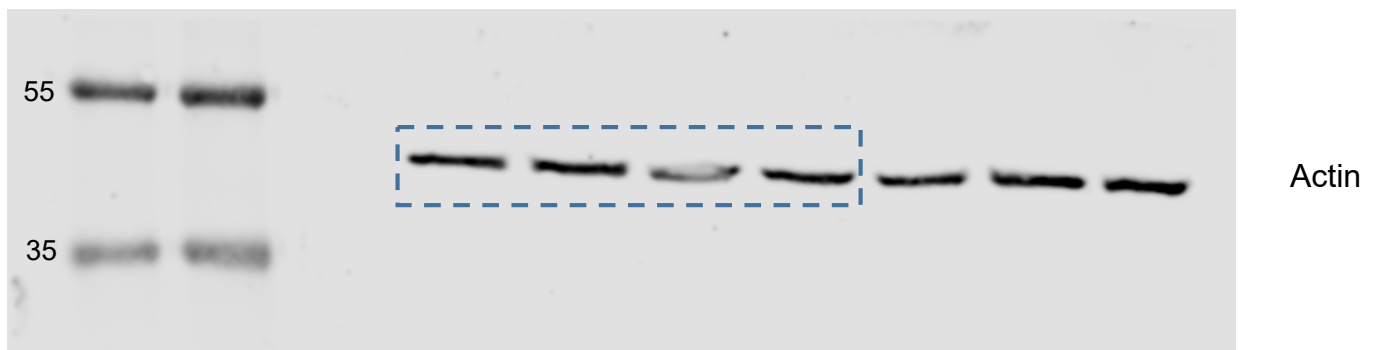

Detected with IRDye 680RD- and IRDye 800CW-conjugated antibodies using a Odyssey Fc Imager (LI-COR)

Lanes not included in the figures are marked with an X

Figure 4B

|                           |   |   |     |    |
|---------------------------|---|---|-----|----|
| 10 ng/ $\mu$ l mL-6       | - | + | +   | +  |
| tocilizumab [ $\mu$ g/ml] | 0 | 0 | 0.1 | 10 |

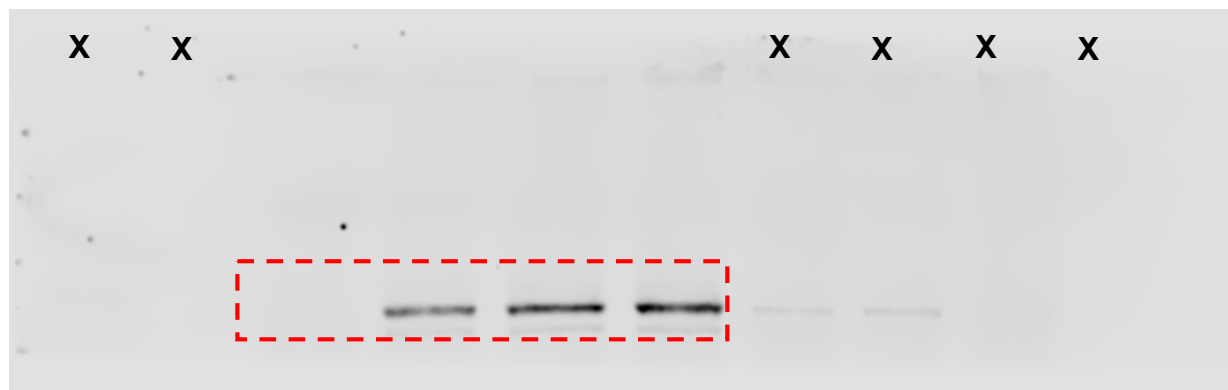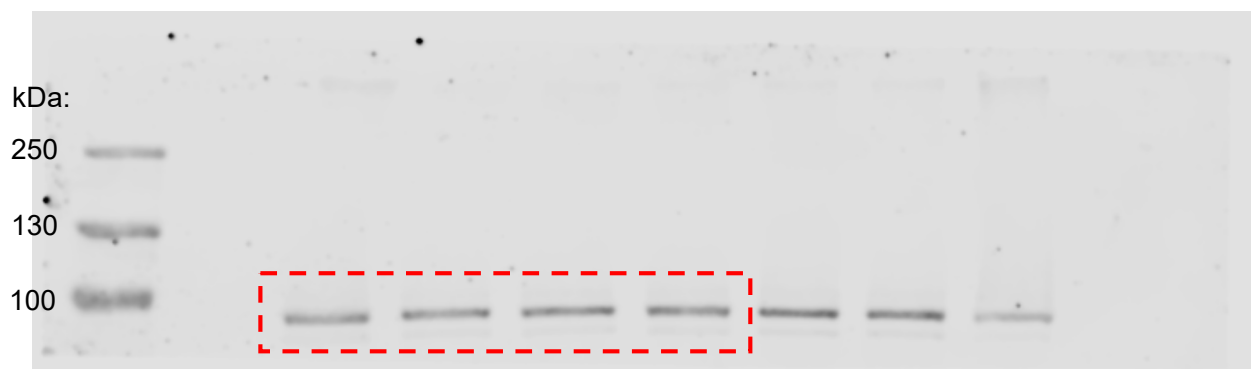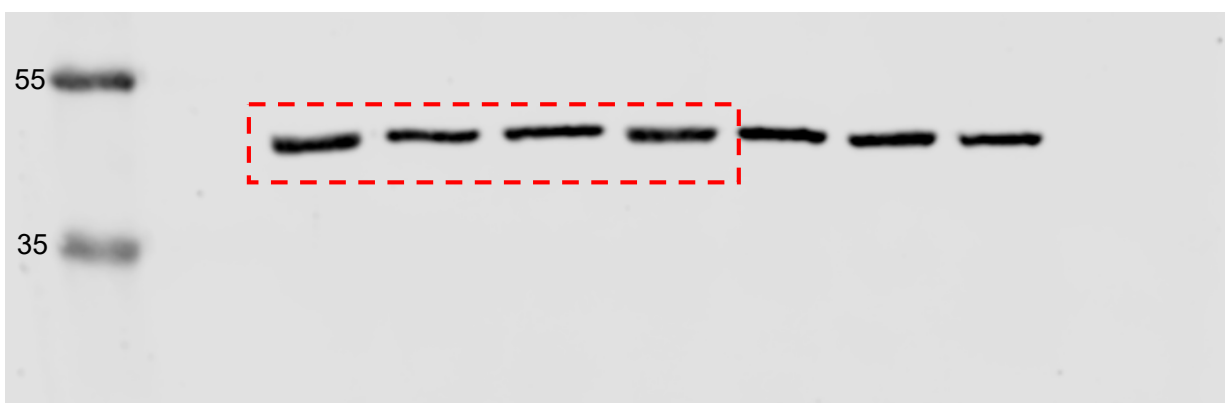

Detected with IRDye 680RD- and IRDye 800CW-conjugated antibodies using a Odyssey Fc Imager (LI-COR)

Lanes not included in the figures are marked with an X

Figure 4C

- + + + 10 ng/μl hIL-6  
0 0 0.1 10 tocilizumab [μg/ml]

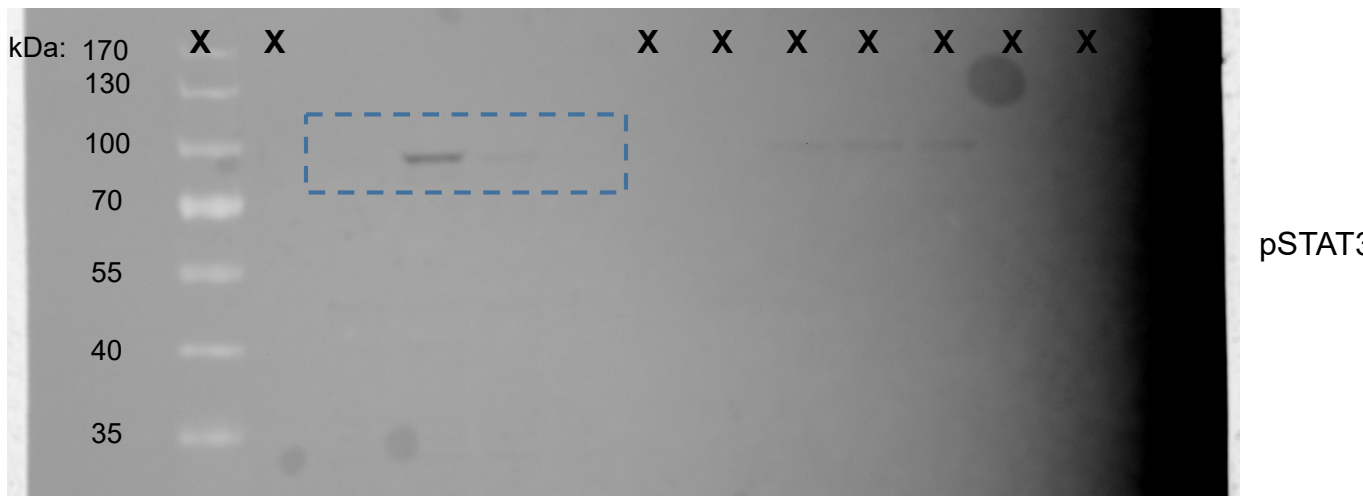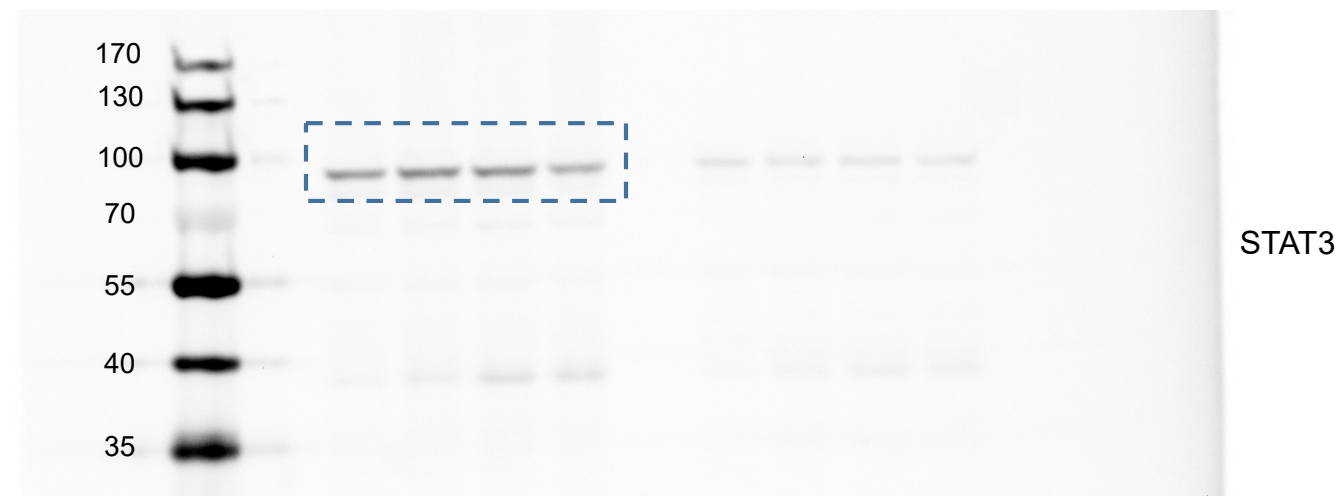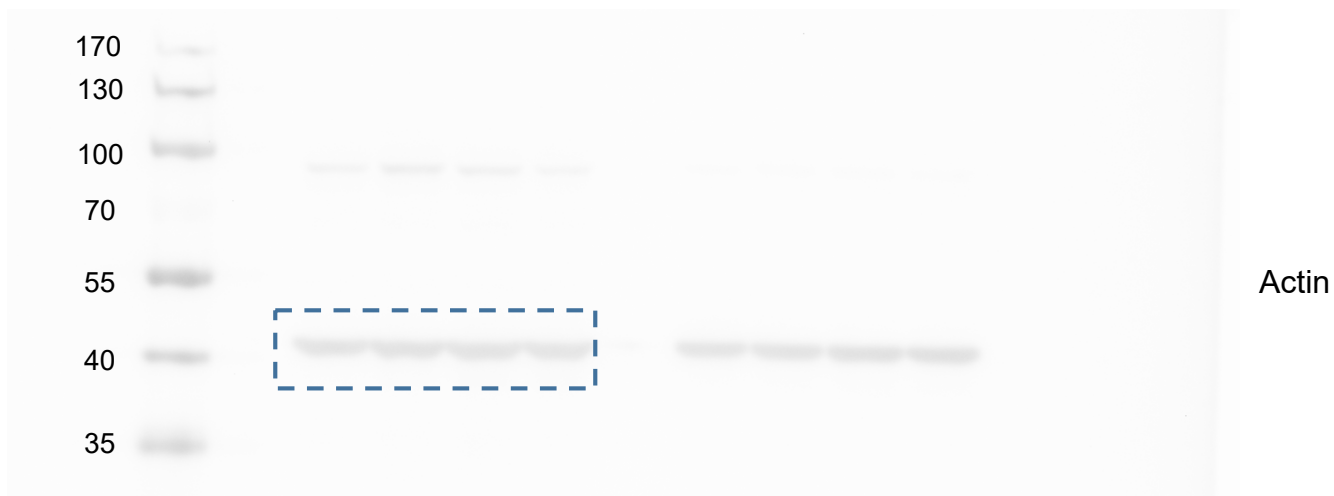

Detected with Alexa Fluor488- and Alexa Fluor647-conjugated antibodies using a ChemoStar ECL Imager (Intas)

Lanes not included in the figures are marked with an X

Figure 4D

10 ng/ $\mu$ l mL-6    -    +    +    +  
tocilizumab [ $\mu$ g/ml]    0    0    0.1    10

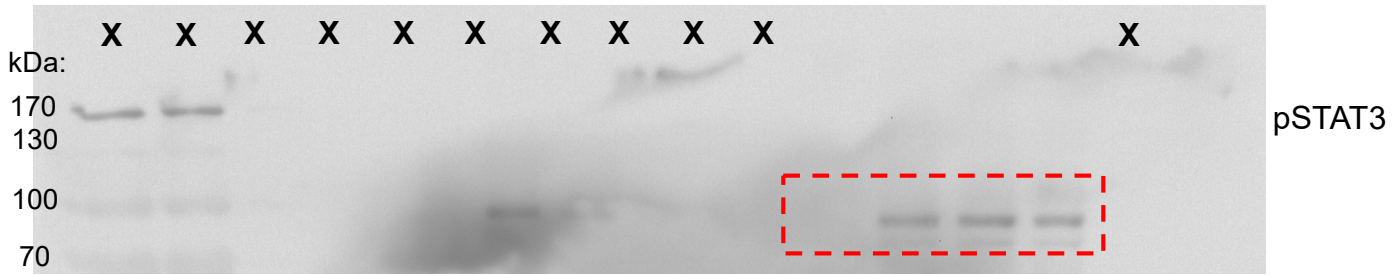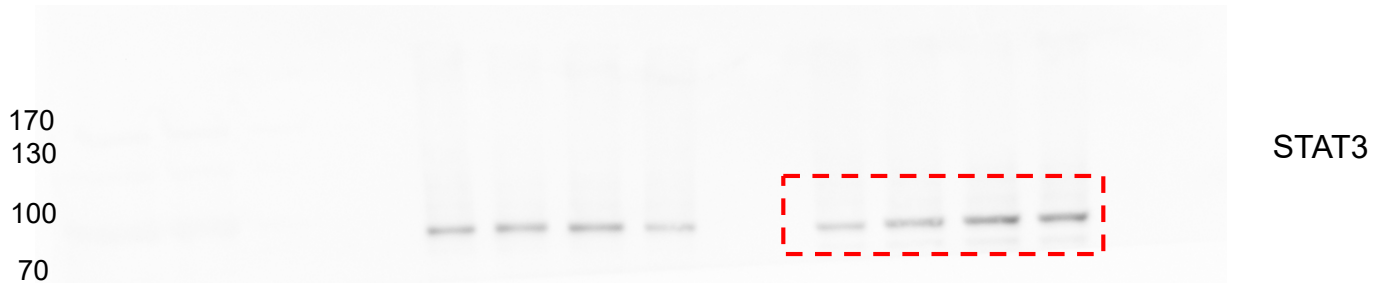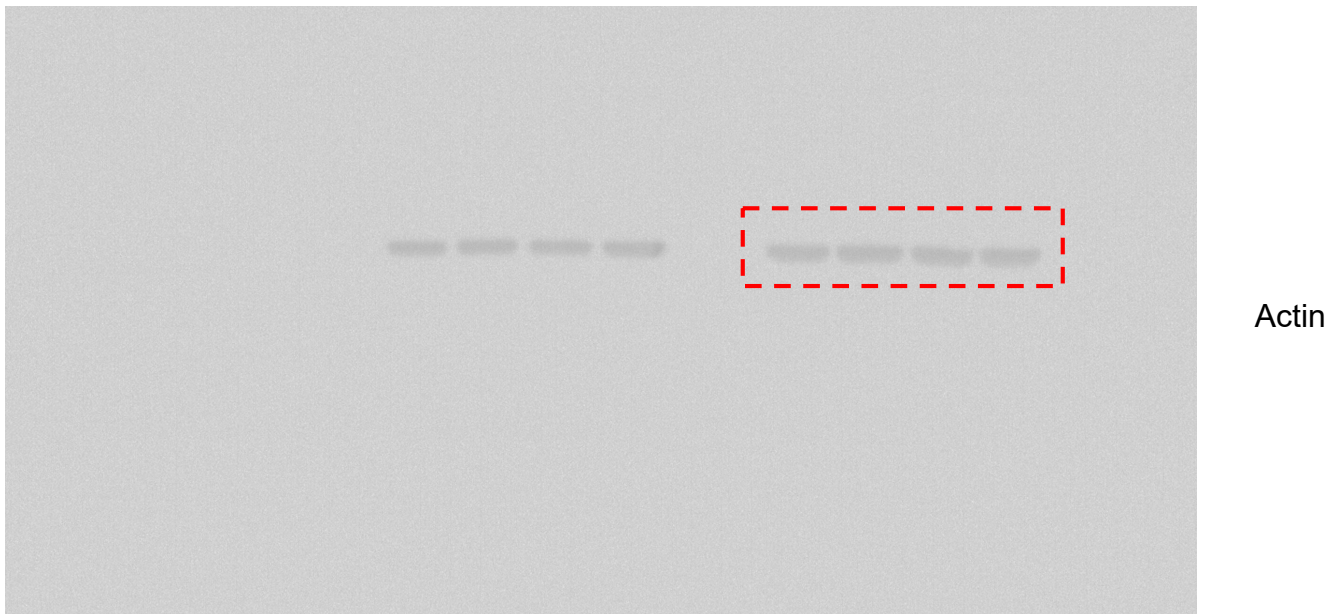

Detected with Alexa Fluor488- and Alexa Fluor647-conjugated antibodies using a ChemoStar ECL Imager (Intas)

Lanes not included in the figures are marked with an X
